# Supplementary material for: Allosteric Communication in Myosin V: From Small Conformational Changes to Large Directed Movements
Source: PubMed Central journal article supplement (PMC2497441; doi:10.1371/journal.pcbi.1000129), 2008-08-15
Supplement: pcbi.1000129.s008.pdf [file pcbi.1000129.s008.pdf]

| <b>Subdomains</b> | Number of Residues | Amino Acids Involved        |
|-------------------|--------------------|-----------------------------|
| SH3               | 60                 | 1-60                        |
| N                 | 154                | 61-184 & 654-683            |
| U50               | 230                | 199-340 & 354-438 & 575-593 |
| L50               | 135                | 448-540 & 547-569 & 635-653 |
| C                 | 63                 | 700-762                     |
| IQ                | 33                 | 763-795                     |
| ELC               | 151                | 1-151                       |

  

| <b>Linkers</b> | Number of Residues | Amino Acids Involved |
|----------------|--------------------|----------------------|
| P-loop         | 9                  | 161-169              |
| switch I       | 11                 | 209-219              |
| switch II      | 12                 | 437-448              |
| strut          | 6                  | 569-574              |
| SH1 helix      | 10                 | 687-696              |

TABLE S1: The myosin V subdomains and linkers. For each element the name, the number of residues, the amino acids involved are specified.
