# Supplementary material for: Allosteric Communication in Myosin V: From Small Conformational Changes to Large Directed Movements
Source: PubMed Central journal article supplement (PMC2497441; doi:10.1371/journal.pcbi.1000129), 2008-08-15
Supplement: pcbi.1000129.s009.pdf [file pcbi.1000129.s009.pdf]

| <b>Secondary-Structure Elements</b> | Secondary Structure | Number of Residues | Amino Acids Involved  | Protein Subdomain |
|-------------------------------------|---------------------|--------------------|-----------------------|-------------------|
| HB                                  | $\alpha$ -helix     | 15                 | G82-S96               | N                 |
| HE                                  | $\alpha$ -helix     | 15                 | I139-D153             | N                 |
| HF                                  | $\alpha$ -helix     | 15                 | K169-V183             | N                 |
| HH                                  | $\alpha$ -helix     | 15                 | V192-I206             | U50               |
| HI                                  | $\alpha$ -helix     | 8                  | H260-A267             | U50               |
| HK                                  | $\alpha$ -helix     | 14                 | D301-L314             | U50               |
| HL                                  | $\alpha$ -helix     | 18                 | D319-G336             | U50               |
| HM                                  | $\alpha$ -helix     | 10                 | D355-M364             | U50               |
| HN                                  | $\alpha$ -helix     | 8                  | Y368-L375             | U50               |
| HO                                  | $\alpha$ -helix     | 31                 | K393-L423             | U50               |
| HP                                  | $\alpha$ -helix     | 18                 | F449-N466             | L50               |
| Relay                               | $\alpha$ -helix     | 14                 | M467-E480             | L50               |
| HP-Relay                            | $\alpha$ -helix     | 32                 | F449-E480             | L50               |
| HQ                                  | $\alpha$ -helix     | 8                  | Q493-E500             | L50               |
| HR                                  | $\alpha$ -helix     | 10                 | V505-K514             | L50               |
| HS                                  | $\alpha$ -helix     | 12                 | D520-D531             | L50               |
| HT                                  | $\alpha$ -helix     | 8                  | G563-V570             | L50               |
| HU                                  | $\alpha$ -helix     | 9                  | E574-I582             | U50               |
| HW                                  | $\alpha$ -helix     | 17                 | V636-A652             | L50               |
| SH1                                 | $\alpha$ -helix     | 10                 | V687-G696             | $\times$          |
| SH2                                 | $\alpha$ -helix     | 10                 | E675-L684             | N                 |
| HX                                  | $\alpha$ -helix     | 7                  | Q705-D711             | C                 |
| HY                                  | $\alpha$ -helix     | 12                 | R724-L735             | C                 |
| HZ                                  | $\alpha$ -helix     | 39                 | G754-R792             | C/IQ              |
| $\beta_1$                           | $\beta$ -strand     | 4                  | Y100-C103             | N                 |
| $\beta_2$                           | $\beta$ -strand     | 5                  | V106-I110             | N                 |
| $\beta_3$                           | $\beta$ -strand     | 8                  | I655-S662             | N                 |
| $\beta_4$                           | $\beta$ -strand     | 6                  | Q157-S162             | N                 |
| $\beta_5$                           | $\beta$ -strand     | 8                  | S431-I438             | U50               |
| $\beta_6$                           | $\beta$ -strand     | 8                  | G221-F228             | U50               |
| $\beta_7$                           | $\beta$ -strand     | 10                 | I234-L243             | U50               |
| $\beta_{sh}$                        | $\beta$ -sheet      | 49                 | $\beta_1$ - $\beta_7$ | $\times$          |

TABLE S2: The myosin V secondary-structure elements. For each element the name, the type of secondary structure, the number of residues, the amino acids involved, and the subdomain to which it belongs are specified.
