# Supplementary material for: Allosteric Communication in Myosin V: From Small Conformational Changes to Large Directed Movements
Source: PubMed Central journal article supplement (PMC2497441; doi:10.1371/journal.pcbi.1000129), 2008-08-15
Supplement: pcbi.1000129.s010.pdf [file pcbi.1000129.s010.pdf]

| <b>rigor-like</b> |            | <b>post-rigor</b> |            | <b>overlap</b>        |
|-------------------|------------|-------------------|------------|-----------------------|
| Mode #            | $\omega^R$ | Mode #            | $\omega^P$ | $(L_i^R \cdot L_j^P)$ |
| <b>1</b>          | 0.224      | <b>1</b>          | 0.296      | 0.87                  |
| <b>2</b>          | 0.429      | <b>3</b>          | 0.530      | 0.93                  |
| <b>3</b>          | 0.584      | <b>2</b>          | 0.439      | 0.86                  |
| <b>4</b>          | 0.936      | <b>4</b>          | 0.950      | 0.84                  |
| <b>5</b>          | 1.208      | <b>5</b>          | 1.144      | 0.80                  |
| <b>6</b>          | 1.244      | <b>6</b>          | 1.318      | 0.80                  |
| <b>7</b>          | 1.573      | <b>7</b>          | 1.466      | 0.82                  |
| <b>9</b>          | 1.789      | <b>8</b>          | 1.677      | 0.73                  |
| <b>10</b>         | 1.982      | <b>11</b>         | 2.037      | 0.62                  |
| <b>11</b>         | 2.044      | <b>10</b>         | 1.840      | 0.64                  |
| <b>12</b>         | 2.305      | <b>12</b>         | 2.245      | 0.78                  |
| <b>13</b>         | 2.424      | <b>13</b>         | 2.352      | 0.66                  |
| <b>15</b>         | 2.799      | <b>15</b>         | 2.546      | 0.78                  |
| <b>20</b>         | 3.310      | <b>24</b>         | 3.519      | 0.66                  |
| <b>21</b>         | 3.452      | <b>21</b>         | 3.296      | 0.63                  |

TABLE S3: Normal mode frequencies of highly correlated modes in the rigor-like and post-rigor states of myosin V. An overlap value of 0.6 was used as a lower-bound threshold in selecting highly correlated pairs. The  $\omega$  values are given in wave numbers ( $\text{cm}^{-1}$ ).
