# Supplementary material for: Allosteric Communication in Myosin V: From Small Conformational Changes to Large Directed Movements
Source: PubMed Central journal article supplement (PMC2497441; doi:10.1371/journal.pcbi.1000129), 2008-08-15
Supplement: pcbi.1000129.s011.pdf [file pcbi.1000129.s011.pdf]

| Mode      | <b>rigor</b> | <b>post</b> | Mode      | <b>rigor</b> | <b>post</b> |
|-----------|--------------|-------------|-----------|--------------|-------------|
| #         | $\omega^R$   | $\omega^P$  | #         | $\omega^R$   | $\omega^P$  |
| <b>1</b>  | 0.224        | 0.296       | <b>21</b> | 3.452        | 3.296       |
| <b>2</b>  | 0.429        | 0.439       | <b>22</b> | 3.480        | 3.378       |
| <b>3</b>  | 0.584        | 0.530       | <b>23</b> | 3.569        | 3.519       |
| <b>4</b>  | 0.936        | 0.950       | <b>24</b> | 3.669        | 3.547       |
| <b>5</b>  | 1.208        | 1.144       | <b>25</b> | 3.827        | 3.652       |
| <b>6</b>  | 1.244        | 1.318       | <b>26</b> | 3.971        | 3.791       |
| <b>7</b>  | 1.573        | 1.466       | <b>27</b> | 4.012        | 3.900       |
| <b>8</b>  | 1.694        | 1.677       | <b>28</b> | 4.098        | 3.994       |
| <b>9</b>  | 1.789        | 1.789       | <b>29</b> | 4.292        | 4.113       |
| <b>10</b> | 1.982        | 1.840       | <b>30</b> | 4.320        | 4.240       |
| <b>11</b> | 2.044        | 2.037       | <b>31</b> | 4.633        | 4.261       |
| <b>12</b> | 2.305        | 2.245       | <b>32</b> | 4.665        | 4.439       |
| <b>13</b> | 2.424        | 2.352       | <b>33</b> | 4.789        | 4.500       |
| <b>14</b> | 2.697        | 2.369       | <b>34</b> | 4.896        | 4.547       |
| <b>15</b> | 2.799        | 2.546       | <b>35</b> | 4.950        | 4.682       |
| <b>16</b> | 2.860        | 2.729       | <b>36</b> | 5.099        | 4.732       |
| <b>17</b> | 2.933        | 2.889       | <b>37</b> | 5.150        | 4.830       |
| <b>18</b> | 3.084        | 2.940       | <b>38</b> | 5.182        | 4.905       |
| <b>19</b> | 3.108        | 3.006       | <b>39</b> | 5.290        | 5.017       |
| <b>20</b> | 3.310        | 3.037       | <b>40</b> | 5.328        | 5.123       |

TABLE S4: Normal mode frequencies of the first 40 lowest-frequency modes of the rigor-like and post-rigor states of myosin V.
