# Supplementary material for: Allosteric Communication in Myosin V: From Small Conformational Changes to Large Directed Movements
Source: PubMed Central journal article supplement (PMC2497441; doi:10.1371/journal.pcbi.1000129), 2008-08-15
Supplement: pcbi.1000129.s013.pdf [file pcbi.1000129.s013.pdf]

| Subdomains     | Rigor-like | NMSM | Post-rigor | $\Delta_{\mathbf{M}/\mathbf{R}}$ | $\Delta_{\mathbf{P}/\mathbf{R}}$ |
|----------------|------------|------|------------|----------------------------------|----------------------------------|
| <b>N/U50</b>   | 36.0       | 36.2 | 36.0       | 0.2                              | 0.0                              |
| <b>N/L50</b>   | 27.5       | 27.7 | 27.5       | 0.2                              | 0.0                              |
| <b>U50/L50</b> | 29.5       | 31.4 | 31.4       | 1.9                              | 1.9                              |
| <b>N/C</b>     | 30.9       | 34.6 | 34.9       | 3.7                              | 4.0                              |
| <b>U50/C</b>   | 64.1       | 67.7 | 67.9       | 3.6                              | 3.8                              |
| <b>L50/C</b>   | 42.6       | 44.5 | 44.4       | 1.9                              | 1.8                              |

TABLE S6: Inter-subdomain center of mass distances;  $\Delta_{\mathbf{M}}$  shows the distance obtained from the NMSM path, while  $\Delta_{\mathbf{P}}$  the one from the post-rigor X-ray structure.
