# Supplementary material for: Allosteric Communication in Myosin V: From Small Conformational Changes to Large Directed Movements
Source: PubMed Central journal article supplement (PMC2497441; doi:10.1371/journal.pcbi.1000129), 2008-08-15
Supplement: pcbi.1000129.s014.pdf [file pcbi.1000129.s014.pdf]

| $\beta$ -strand pair | NMSM $\Delta\tau$ [deg] |
|----------------------|-------------------------|
| $\beta_1\beta_2$     | 4.0                     |
| $\beta_2\beta_3$     | 2.9                     |
| $\beta_3\beta_4$     | 1.8                     |
| $\beta_4\beta_5$     | 2.3                     |
| $\beta_5\beta_6$     | 1.8                     |
| $\beta_6\beta_7$     | 1.1                     |

TABLE S7:  $\Delta\tau$  values between pairs of neighboring strands at the end of the NMSM path ( $\Delta\tau_{ij} = \tau_{ij}(\text{rigor}) - \tau_{ij}(\text{NMSM})$ ).
