# Supplementary material for: Allosteric Communication in Myosin V: From Small Conformational Changes to Large Directed Movements
Source: PubMed Central journal article supplement (PMC2497441; doi:10.1371/journal.pcbi.1000129), 2008-08-15
Supplement: pcbi.1000129.s015.pdf [file pcbi.1000129.s015.pdf]

| $\tau_{ij}$ [deg] | $\beta$ -strand pair | rigor-like min | post-rigor NMSM | post-rigor min |
|-------------------|----------------------|----------------|-----------------|----------------|
| $\tau_{12}$       | $\beta_1\beta_2$     | 26.0           | 26.2            | 25.9           |
| $\tau_{23}$       | $\beta_2\beta_3$     | 10.5           | 11.5            | 9.8            |
| $\tau_{13}$       | $\beta_1\beta_3$     | 36.5           | 37.8            | 35.6           |
| $\Delta\tau$      |                      | 0.0            | 1.3             | 0.8            |

TABLE S8: Twist values for pairs of neighboring strands in the converter  $\beta$ -sheet. The values were computed for the energy-minimized rigor-like and post-rigor structures, and the NMSM post-rigor conformation.  $\Delta\tau$  values relative to the rigor-like ( $\Delta\tau = |\tau_{13}(\text{rigor}) - \tau_{13}(X)|$ ) show that the three-stranded  $\beta$ -sheet is fairly rigid, so that it allows for efficient structural communication between the N and L50 subdomains.
